# Supplementary material
Source: PubMed Central journal article supplement (PMC6433512)
Supplement: NIHMS1521901-supplement-Supplemental_Material.pdf [file NIHMS1521901-supplement-Supplemental_Material.pdf]

## SUPPLEMENTAL MATERIAL

**Supplementary Table I.** Comparison of basic characteristics of probable CAA patients included vs. excluded from the current analysis.

| <b>Characteristic</b>                      | <b>Included patients<br/>(N=118)</b> | <b>Excluded patients<br/>(N=143)</b> | <b>p-value</b> |
|--------------------------------------------|--------------------------------------|--------------------------------------|----------------|
| <b>Age at MRI, mean (SD), years</b>        | 73 (8.3)                             | 76.6 (8.3)                           | 0.001          |
| <b>Sex, male n (%)</b>                     | 75 (64)                              | 87 (61)                              | 0.631          |
| <b>Hypertension, n (%)</b>                 | 78 (66.1)                            | 95 (66.4)                            | 0.732          |
| <b>Hypercholesterolemia, n (%)</b>         | 70 (57.9)                            | 76 (53.2)                            | 0.317          |
| <b>Warfarin use at presentation, n (%)</b> | 14 (11.9)                            | 17 (12)                              | 0.979          |
| <b>Severe (Fazekas 5-6) WMH, n (%)</b>     | 32 (27.1)                            | 58 (40.6)                            | 0.023          |
| <b>WMH volume, median (IQR), cc</b>        | 19.1 (10-35.6)                       | 21 (7.2-43.5)                        | 0.612          |
| <b>Lobar CMBs count, median (IQR)</b>      | 4 (2-28)                             | 5 (3-18)                             | 0.370          |
| <b>≥5 CMBs presence, n (%)</b>             | 58 (49.2)                            | 78 (54.6)                            | 0.464          |
| <b>Presence of cSS, n (%)</b>              | 52 (44.1)                            | 43 (30.1)                            | 0.099          |
